# Supplementary material
Source: publisher figshare collection journal article supplement (https://gsajournals.figshare.com/ndownloader/files/18022742)
Supplement: Supplementary file 1 [file 18022742]

| A                                                                    |  | ♂ |                                                       |                                                                         |
|----------------------------------------------------------------------|--|---|-------------------------------------------------------|-------------------------------------------------------------------------|
| ♀                                                                    |  |   | <i>tubGAL80</i>                                       | Y                                                                       |
|                                                                      |  |   | no GFP expression                                     | no GFP expression                                                       |
|                                                                      |  |   | <i>cad-GFP exp</i><br>no <i>GFP<sup>nls</sup> exp</i> | <i>cad-GFP exp</i><br>no <i>GFP<sup>nls</sup> exp</i>                   |
|                                                                      |  |   | <i>cad-GFP exp</i><br>no <i>GFP<sup>nls</sup> exp</i> | <b>MUTANT</b><br><i>cad-GFP exp</i><br>AND <i>GFP<sup>nls</sup> exp</i> |
|                                                                      |  |   | no GFP expression                                     | <b>MUTANT</b><br>no GFP expression                                      |
| <i>FM7h,w ; CyO</i>                                                  |  |   |                                                       |                                                                         |
| <i>FM7h,w ; Ubi-DEcadherin + UAS-GFP<sup>nls</sup></i>               |  |   |                                                       |                                                                         |
| <i>NP7278<sup>ex1</sup> ; Ubi-DEcadherin + UAS-GFP<sup>nls</sup></i> |  |   |                                                       |                                                                         |
| <i>NP7278<sup>ex1</sup> ; CyO</i>                                    |  |   |                                                       |                                                                         |

  

| B                                                                    |  | ♂ |                                                                   |                                                                                            |
|----------------------------------------------------------------------|--|---|-------------------------------------------------------------------|--------------------------------------------------------------------------------------------|
| ♀                                                                    |  |   | <i>tubGAL80 ; UAS-X</i>                                           | Y ; UAS-X                                                                                  |
|                                                                      |  |   | no GFP exp<br>no X exp                                            | no GFP exp<br>no X exp                                                                     |
|                                                                      |  |   | <i>cad-GFP exp</i><br>no <i>GFP<sup>nls</sup> exp</i><br>no X exp | <i>cad-GFP exp</i><br>no <i>GFP<sup>nls</sup> exp</i><br>no X exp                          |
|                                                                      |  |   | <i>cad-GFP exp</i><br>no <i>GFP<sup>nls</sup> exp</i><br>no X exp | <b>RESCUED MUT?</b><br><i>cad-GFP exp</i><br>AND <i>GFP<sup>nls</sup> exp</i><br>AND X exp |
|                                                                      |  |   | no GFP expression<br>no X exp                                     | <b>RESCUED MUT?</b><br>no GFP expression<br>AND X exp                                      |
| <i>FM7h,w ; CyO</i>                                                  |  |   |                                                                   |                                                                                            |
| <i>FM7h,w ; Ubi-DEcadherin + UAS-GFP<sup>nls</sup></i>               |  |   |                                                                   |                                                                                            |
| <i>NP7278<sup>ex1</sup> ; Ubi-DEcadherin + UAS-GFP<sup>nls</sup></i> |  |   |                                                                   |                                                                                            |
| <i>NP7278<sup>ex1</sup> ; CyO</i>                                    |  |   |                                                                   |                                                                                            |

**Figure S3.** Punnett square diagrams of crosses used to unambiguously identify *hnt*<sup>NP7278<sup>ex1</sup></sup> mutant embryos. (A) Control cross of *FM7h,w*; *hnt*<sup>NP7278<sup>ex1</sup></sup>; *Ubi-DEcadherin-GFP + UAS-GFP<sup>nls</sup>*/ *CyO* females crossed to X-linked *tubGAL80* males. Here the only progeny with *GAL4 > UAS-GFP<sup>nls</sup>* expression are hemizygous mutant males (solid green box). Other embryos express *Ubi-DEcadherin-GFP* (*Ubi-DE cadherin = cad-GFP*) as shown by boxes outlined in green. (B) In the rescue experiment, the same females are crossed to *tubGAL80* males that also carry an autosomal *UAS* reporter. Again, the only progeny to express *UAS-GFP<sup>nls</sup>* are the *hnt*<sup>NP7278<sup>ex1</sup></sup> mutant males (solid green box), which also co-express the *UAS-X* reporter and can be scored for rescue of the *hnt*<sup>NP7278<sup>ex1</sup></sup> mutant phenotype.
